# Supplementary material
Source: PubMed Central journal article supplement (PMC1801046)
Supplement: blood_blood-2006-06-031385_1.pdf [file blood_blood-2006-06-031385_1.pdf]

**Table S1. Profile of ICL Cohort**

| <b>No.</b> | <b>CD4</b><br>(410-1540) | <b>CD19</b><br>(100-500) | <b>CD8</b><br>(230-1090) | <b>CD10*</b> | <b>Total Lymphs</b><br>(1200-2400) | <b>Cytopenia</b> | <b>Age</b><br>y |
|------------|--------------------------|--------------------------|--------------------------|--------------|------------------------------------|------------------|-----------------|
| 1          | 45                       | 346                      | 842                      | 95           | 1504                               | CD4              | 38              |
| 2          | 78                       | 375                      | 622                      | 123          | 1296                               | CD4              | 58              |
| 3          | 176                      | 74                       | 331                      | 14           | 675                                | CD4,CD19         | 48              |
| 4          | 299                      | 102                      | 95                       | 27           | 680                                | CD4,CD8          | 45              |
| 5          | 114                      | 114                      | 177                      | 25           | 632                                | CD4,CD8          | 36              |
| 6          | 90                       | 135                      | 148                      | 53           | 642                                | CD4,CD8          | 61              |
| 7          | 209                      | 148                      | 141                      | 26           | 615                                | CD4,CD8          | 30              |
| 8          | 160                      | 569                      | 765                      | 194          | 1778                               | CD4              | 44              |
| 9          | 65                       | 362                      | 659                      | 126          | 1292                               | CD4              | 52              |
| 10         | 69                       | 353                      | 382                      | 74           | 980                                | CD4              | 26              |
| 11         | 133                      | 125                      | 333                      | 40           | 1389                               | CD4              | 41              |
| 12         | 206                      | 84                       | 112                      | 9            | 558                                | CD4,CD8,CD19     | 43              |
| 13         | 159                      | 251                      | 490                      | 50           | 1139                               | CD4              | 85              |
| 14         | 179                      | 61                       | 130                      | 15           | 407                                | CD4,CD8,CD19     | 54              |
| 15         | 18                       | 137                      | 442                      | 61           | 442                                | CD4,CD19         | 50              |
| 16         | 192                      | 206                      | 236                      | 64           | 737                                | CD4              | 52              |
| 17         | 98                       | 245                      | 196                      | 33           | 818                                | CD4,CD8          | 49              |
| 18         | 328                      | 206                      | 145                      | 38           | 763                                | CD4,CD8          | 51              |
| 19         | 330                      | 298                      | 298                      | 60           | 1064                               | CD4              | 44              |
| 20         | 466                      | 316                      | 533                      | 31           | 1665                               |                  | 35              |
| 21         | 428                      | 237                      | 214                      | 45           | 1127                               | CD8              | 33              |
| 22         | 401                      | 182                      | 164                      | 15           | 912                                | CD4,CD8          | 43              |
| 23         | 696                      | 302                      | 363                      | 45           | 1512                               |                  | 40              |
| 24         | 507                      | 360                      | 280                      | 84           | 1333                               |                  | 28              |
| 25         | 372                      | 216                      | 180                      | 46           | 1200                               | CD4,CD8          | 41              |

Numbers for CD4, CD19, CD8, CD10, and total lymphocytes are cells/ $\mu$ l.

Normal ranges are indicated in parentheses.

\*Refers to CD27/CD19<sup>+</sup> cells expressing CD10.
