# Supplementary material
Source: PubMed Central journal article supplement (PMC1801046)

Figure S1

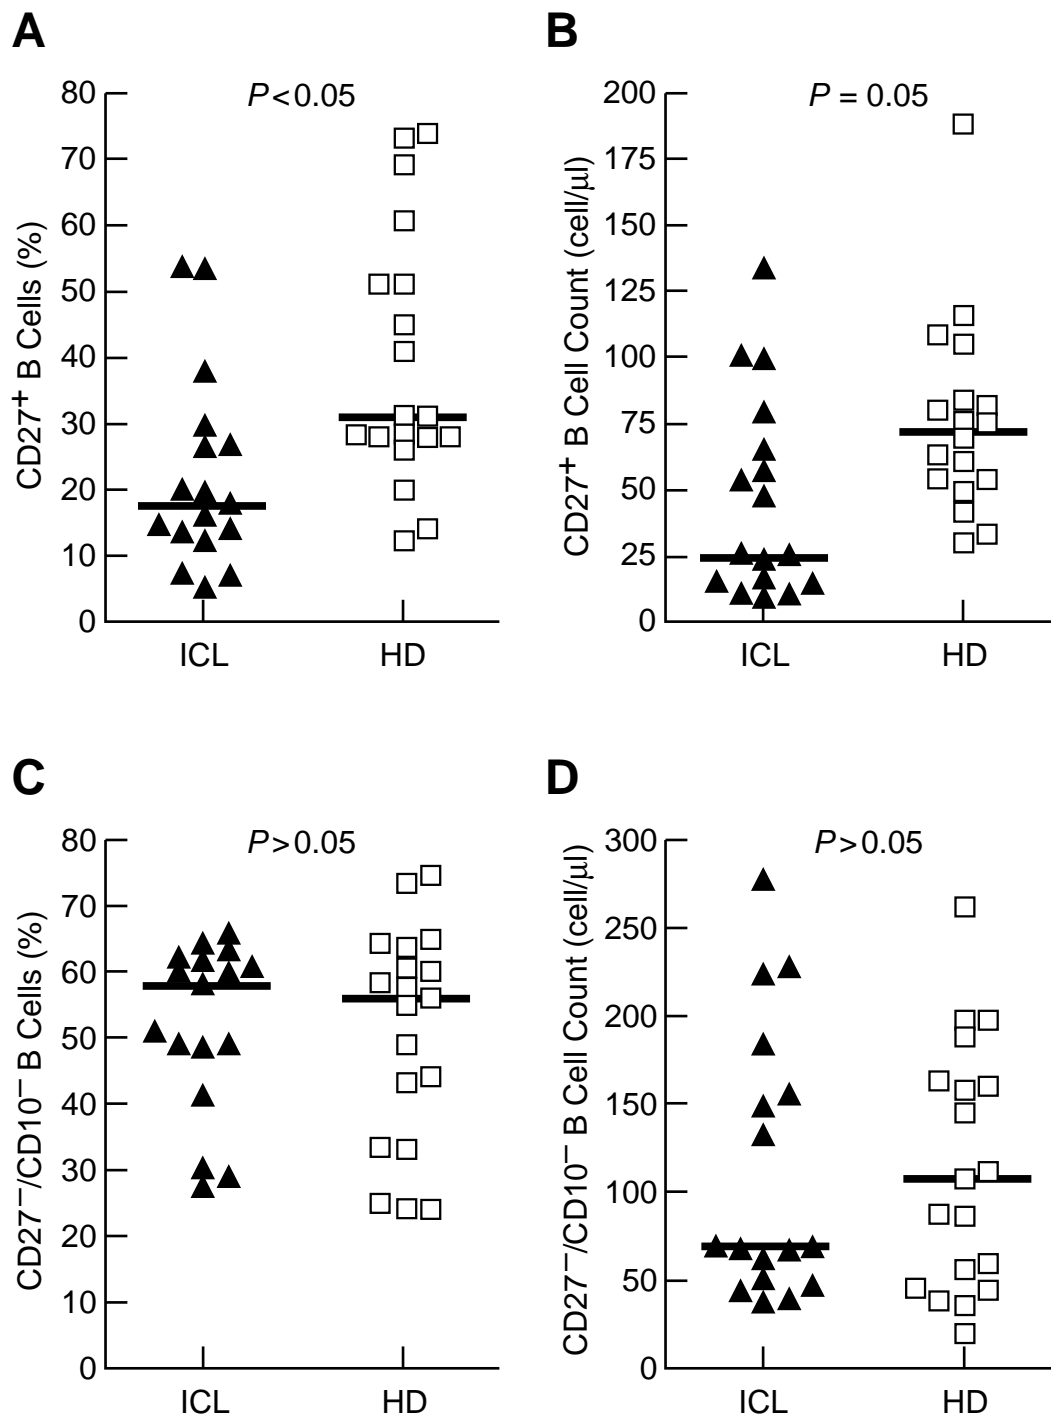

Supplement: blood_blood-2006-06-031385_2.pdf [file blood_blood-2006-06-031385_2.pdf]
